# Supplementary material for: Ganitumab and metformin plus standard neoadjuvant therapy in stage 2/3 breast cancer
Source: PubMed Central journal article supplement (PMC8492731; doi:10.1038/s41523-021-00337-2), 2021-10-05
Supplement: 41523_2021_337_MOESM1_ESM.pdf [file 41523_2021_337_MOESM1_ESM.pdf]

## Supplementary Materials

**Ganitumab and Metformin plus Standard Neoadjuvant Therapy in Stage 2/3 Breast Cancer: Results from the I-SPY2 Adaptively Randomized Platform Trial**

*Yee D, et al.*

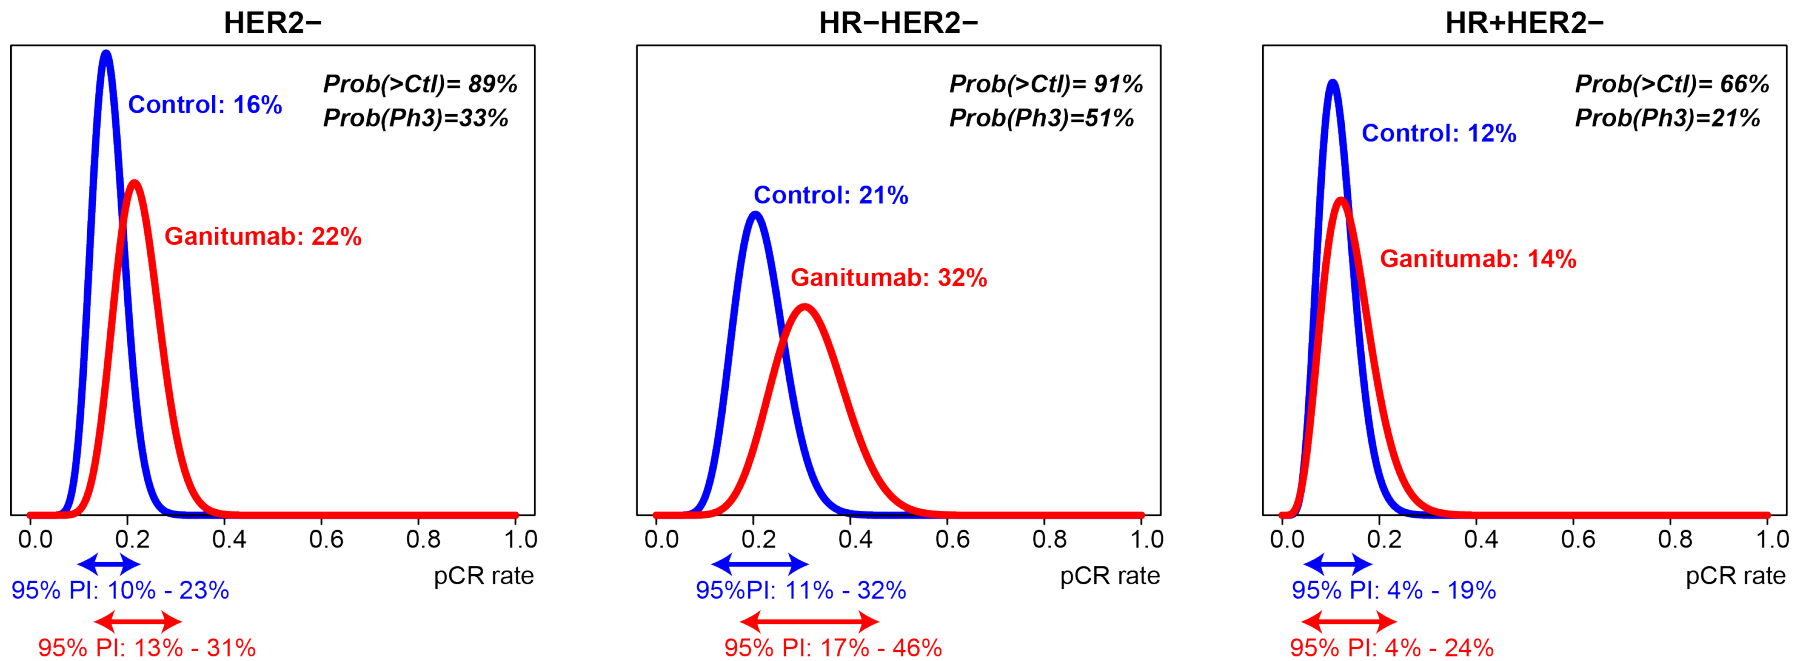

**Supplementary Figure 1:** Final posterior probability distributions of experimental and control arms for each HER2- biomarker signature

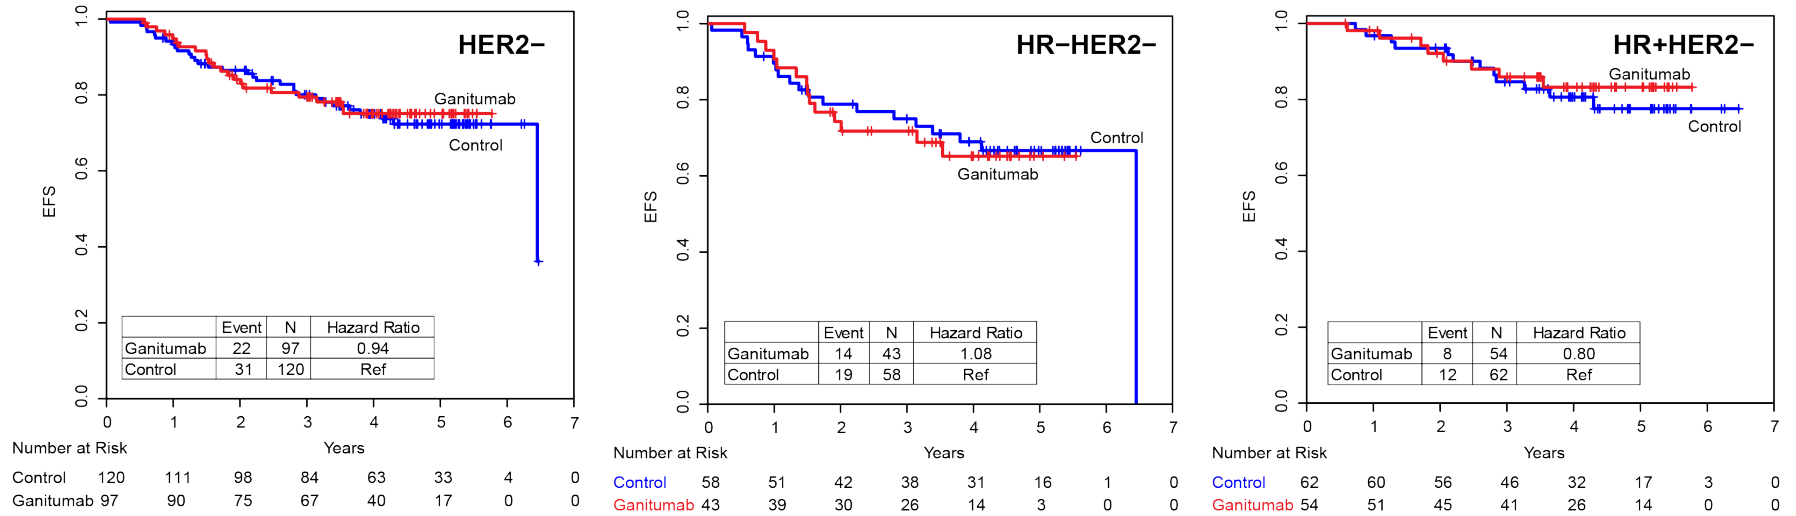

**Supplementary Figure 2:** Survival plots of patients in the ganitumab and control arms for all HER2- patients, HR-HER2- patients and HR+HER2- patients.

Supplementary Table 1

| Gene/<br>signature   | All subtypes         |               |                  |             |                |                  | TN subset                       |                                   |               |        |             |               | HR+HER2- subset                 |             |               |             |                |                                 |
|----------------------|----------------------|---------------|------------------|-------------|----------------|------------------|---------------------------------|-----------------------------------|---------------|--------|-------------|---------------|---------------------------------|-------------|---------------|-------------|----------------|---------------------------------|
|                      | Ganitumab<br>(n=106) |               | Ctr<br>(n=127)   |             | All<br>(n=233) |                  | Ganitumab (n=48)                |                                   | Ctr<br>(n=62) |        | All (n=110) |               | Ganitumab (n=58)                |             | Ctr<br>(n=65) |             | All (n=123)    |                                 |
|                      | OR/unit inc          | LR p          | LR p (adj<br>HR) | OR/unit inc | LR p           | LR p (adj<br>HR) | Biomarker<br>x treatment<br>int | Biomarker<br>x treatment<br>int * | OR/unit inc   | LR p   | OR/unit inc | LR p          | Biomarker<br>x treatment<br>int | OR/unit inc | LR p          | OR/unit inc | LR p           | Biomarker<br>x treatment<br>int |
| IGF1                 | 0.946                | 0.83          | 0.882            | 0.759       | 0.242          | 0.266            | 0.535                           | 0.553                             | 0.931         | 0.833  | 0.877       | 0.629         | 0.891                           | 1.01        | 0.977         | 0.568       | 0.195          | 0.354                           |
| IGF2                 | 0.585                | 0.0564        | 0.128            | 0.694       | 0.191          | 0.27             | 0.687                           | 0.694                             | 0.555         | 0.0848 | 0.842       | 0.563         | 0.407                           | 0.937       | 0.897         | 0.555       | 0.243          | 0.466                           |
| IGF1R                | 0.779                | 0.326         | 0.948            | 0.599       | <b>0.0489</b>  | 0.133            | 0.488                           | 0.57                              | 0.503         | 0.11   | 0.76        | 0.538         | 0.514                           | 1.71        | 0.162         | 0.522       | 0.136          | <b>0.0412</b>                   |
| INSR                 | 0.694                | 0.118         | 0.161            | 0.865       | 0.567          | 0.63             | 0.529                           | 0.509                             | 0.714         | 0.307  | 0.807       | 0.487         | 0.79                            | 0.704       | 0.335         | 1.07        | 0.874          | 0.467                           |
| IGFBP2               | 0.787                | 0.344         | 0.931            | 0.66        | 0.0675         | 0.156            | 0.606                           | 0.535                             | 1.2           | 0.607  | 1.14        | 0.681         | 0.914                           | 0.773       | 0.586         | 0.381       | <b>0.00894</b> | 0.24                            |
| IRS1                 | 0.614                | <b>0.0479</b> | 0.304            | 0.619       | 0.0554         | 0.131            | 0.984                           | 0.983                             | 0.892         | 0.755  | 0.882       | 0.719         | 0.983                           | 0.601       | 0.23          | 0.433       | 0.0541         | 0.605                           |
| IRS2                 | 1.1                  | 0.678         | 0.995            | 0.944       | 0.806          | 0.788            | 0.64                            | 0.801                             | 1.01          | 0.959  | 0.905       | 0.742         | 0.786                           | 0.961       | 0.929         | 0.994       | 0.987          | 0.954                           |
| IGFBP3               | 1.17                 | 0.423         | 0.781            | 1.03        | 0.912          | 0.932            | 0.71                            | 0.881                             | 0.889         | 0.612  | 0.577       | 0.18          | 0.363                           | 2.07        | 0.11          | 1.76        | 0.151          | 0.796                           |
| IGFBP4               | 0.819                | 0.397         | 0.984            | 0.824       | 0.409          | 0.745            | 0.987                           | 0.948                             | 0.789         | 0.462  | 1.27        | 0.447         | 0.29                            | 1.51        | 0.344         | 0.55        | 0.134          | 0.0857                          |
| IGFBP5               | 0.629                | <b>0.0421</b> | 0.191            | 1           | 0.995          | 0.599            | 0.183                           | 0.155                             | 0.571         | 0.09   | 2.45        | <b>0.0309</b> | <b>0.00606</b>                  | 0.986       | 0.969         | 0.43        | 0.103          | 0.208                           |
| CDH1                 | 0.961                | 0.857         | 0.727            | 0.833       | 0.45           | 0.548            | 0.661                           | 0.587                             | 1.24          | 0.602  | 0.882       | 0.747         | 0.549                           | 1.01        | 0.975         | 0.843       | 0.606          | 0.69                            |
| IGFR_sig_Creighton   | 1.76                 | <b>0.0211</b> | 0.171            | 2.05        | <b>0.00758</b> | <b>0.0198</b>    | 0.695                           | 0.696                             | 1.48          | 0.343  | 1.44        | 0.341         | 0.963                           | 1.47        | 0.324         | 3.48        | <b>0.012</b>   | 0.196                           |
| IGFBP5_IGFP4_ratio   | 0.749                | 0.176         | 0.209            | 1.23        | 0.427          | 0.425            | 0.144                           | 0.156                             | 0.691         | 0.222  | 1.54        | 0.243         | 0.0937                          | 0.841       | 0.603         | 0.961       | 0.922          | 0.802                           |
| IGF1_ligand_score_Mu | 0.534                | <b>0.0143</b> | 0.0939           | 0.627       | 0.06           | 0.114            | 0.67                            | 0.741                             | 0.576         | 0.124  | 0.847       | 0.593         | 0.429                           | 0.716       | 0.446         | 0.43        | 0.0544         | 0.429                           |

\* Adjusted for HR

## SUPPLEMENTARY REFERENCES

1. Mu, L. *et al.* Favorable outcome associated with an IGF-1 ligand signature in breast cancer. *Breast Cancer Res Tr* **133**, 321–331 (2012).
2. Creighton, C. J. *et al.* Insulin-Like Growth Factor-I Activates Gene Transcription Programs Strongly Associated With Poor Breast Cancer Prognosis. *J Clin Oncol* **26**, 4078–4085 (2008).
